# Assessing the pathogenic potential of less common *Salmonella enterica* serotypes circulating in the Thai pork production chain

1 **Thanaporn Eiamsam-ang<sup>1</sup>, Pakpoom Tadee<sup>2</sup>, Ben Pascoe<sup>2,3\*</sup>, Prapas Patchanee<sup>2\*</sup>**

2 <sup>1</sup> Graduate Program in Veterinary Science, Faculty of Veterinary Medicine, Chiang Mai University,  
3 Muang, Chiang Mai, Thailand.

4 <sup>2</sup> Integrative Research Center for Veterinary Preventive Medicine, Faculty of Veterinary Medicine,  
5 Chiang Mai University, Muang, Chiang Mai, Thailand.

6 <sup>3</sup> The Milner Centre for Evolution, University of Bath, Claverton Down, Bath, United Kingdom.

## 7 **\* Correspondence:**

8 Corresponding Author: Ben Pascoe and Prapas Patchanee

9 [b.pascoe@bath.ac.uk](mailto:b.pascoe@bath.ac.uk); [prapas.pat@cmu.ac.th](mailto:prapas.pat@cmu.ac.th)

10 **Keywords:** *Salmonella*<sub>1</sub>, Whole Genome Sequencing<sub>2</sub>, Core Genome MLST<sub>3</sub>, Antimicrobial  
11 Resistance Genes<sub>4</sub>, Virulence Genes<sub>5</sub>, Pork Production Chain<sub>6</sub>

## 12 **Abstract**

13 *Salmonella* is a frequent zoonotic foodborne pathogen, with swine and pork meats the most  
14 common source of human infection. In Chiang Mai and Lamphun Province in northern Thailand,  
15 there has been a high prevalence of salmonellosis for over a decade. Infection is usually with several  
16 dominant *S. enterica* serotypes, including serotypes Rissen and Monophasic Typhimurium. However,  
17 several less common serotypes also contribute to disease. Whole genome sequencing of 43 of these  
18 less common *S. enterica* serotypes isolated from the pork production chain through 2011-2014 were  
19 used to evaluate their genetic diversity and virulence potential. *Salmonella* contamination at local  
20 retail markets represented cross-contamination from multiple sources, including decontaminated  
21 foodstuff. Previous studies have highlighted the importance of host cell adhesion, invasion and  
22 intracellular survival for the development of clinical salmonellosis. We screened our dataset for  
23 known virulence genes and antimicrobial resistance genes, identifying at least 10 antimicrobial  
24 resistance genes in all isolates. These results indicate that these less common *S. enterica* serotypes  
25 also pose a significant public health risk. Our findings support the need for appropriate surveillance  
26 of food products going to market to reduce public exposure to highly pathogenic, multi-drug resistant  
27 *Salmonella*. Surveillance throughout the pork production chain would motivate stakeholders to  
28 reinforce sanitation standards and help reduce the risk of salmonellosis in humans.

## 29 **1 Introduction**

30 *Salmonella* is recognized as a prevalent bacterial-zoonotic pathogen that causes acute  
31 foodborne illness in humans and is a global public health concern (Chen et al., 2013). In the United  
32 States, approximately 1.35 million people suffer from salmonellosis with 26,500 hospitalizations and  
33 420 deaths reported annually (CDC, 2021). In Southeast Asia, *Salmonella* has consistently  
34 contaminated the production chain for a decade, suggesting that eradication of this disease will  
35 indeed be complicated (Sinwat et al., 2016; Trongjit et al., 2017). According to the Bureau of  
36 Epidemiology of Thailand's annual surveillance report for 2018, *Salmonella* is the most frequently  
37 detected pathogen causing food poisoning in hospitalized patients (Bureau of Epidemiology, 2018).  
38 Swine has been recognized as the one of the important *Salmonella*'s carriers, where the bacteria can  
39 multiply in the digestive tract and can be spread to other steps of the production chain via feces  
40 (Rostagno & Callaway, 2012). Furthermore, pork has been reported to be an important source of  
41 *Salmonella* contamination especially in the retail market which is the predisposing factor of  
42 salmonellosis in human (Patchanee et al., 2016).

43 Investigations have been undertaken to quantify the prevalence of *Salmonella* throughout the  
44 pork production chain in Chiang Mai, Thailand. These studies have reported a high prevalence of  
45 *Salmonella* isolated from swine farms as 30.56% (Tadee et al., 2014), and up to 42% in retail pork  
46 circulating in the Chiang Mai municipality area (Patchanee et al., 2016). These finding suggest that  
47 the burden of *Salmonella* has been continuing and substantial for a decade. All aspects of the  
48 production chain have been contaminated, from the farm-slaughterhouse-retail market, which is  
49 likely related to the levels of sanitation and hygienic at each step of production (Savall et al., 2016;  
50 Chen et al., 2019). *Salmonella* Rissen and Monophasic *Salmonella* Typhimurium have been the most  
51 common serotypes isolated in Chiang Mai and Lamphun provinces for more than a decade and their  
52 epidemiology investigated using molecular typing methods (Prasertsee et al., 2019; Patchanee et al.,  
53 2020). In contrast, many of the less common serotypes, such as *S. enterica* serotypes Anatum,  
54 Panama, Stanley and Give have not been studied further.

55 Whole genome sequencing-based methods are now being used to identify transmission  
56 networks and assess the genetic relatedness of the clonal or closely related strains during an outbreak  
57 (Oakeson et al., 2017). Core genome MLST provides high-resolution data and reveals the precise  
58 relatedness within the species by comparing allelic variation to equivalent loci in other isolates  
59 (Pearce et al., 2020). The emergence of antimicrobial resistance (AMR) in foodborne pathogens  
60 particularly *Salmonella* species has posed a significant threat to public health (Ferri et al., 2017).  
61 Indiscriminate antimicrobial use in the livestock industry has been identified as a driver for

62 multidrug-resistant (MDR) organisms, which can be spread to humans through the food chain (Van  
63 et al., 2015; Nhung et al., 2016). In addition, the pathogenic potential of *Salmonella* has been linked  
64 to expression of virulence genes. Adhesion and invasion genes are essential virulence genes, which  
65 when expressed allow colonization of infecting *Salmonella* of the host cell (Wang et al., 2020).  
66 Expression of genes required for growth and replication within the host are then required for  
67 adequate nutrient uptake (Saha et al., 2019). Furthermore, the virulence genes that are encoded for  
68 resistance to host defense and resistance to antimicrobial peptide are the one of the important  
69 mechanisms to allowing the chronic infection of *Salmonella* (Kintz et al., 2015; Jajere S. M., 2019).  
70 Whole genome sequence-based techniques can help characterize isolates according to their putative  
71 pathogenic potential, by identifying known antimicrobial resistance genes (AMRs) and virulence-  
72 related genes (Campioni & Faicao, 2012).

73 In this study, we sequenced isolates from these less common *Salmonella* serotypes isolated  
74 from farms, slaughterhouses, and retail markets in Chiang Mai and Lamphun provinces between  
75 2011 and 2014. We characterize the genetic diversity of these isolates and compare their genetic  
76 relatedness throughout the production process to assess feasibility of transmission. In addition, we  
77 characterize the antimicrobial resistance genes and virulence genes of each isolate in order to better  
78 understand the potential risk of these less common lineages. These data will help assess public health  
79 risk and inform public health guidance and prevention strategies for minimize *Salmonella*  
80 contamination in the study area.

## 81 **2 Materials & Methods**

### 82 **2.1 Bacterial isolates**

83 A total of 43 *S. enterica* isolates from the pork production chain in Chiang Mai and Lamphun  
84 municipality area were included in this study. These samples were collected from three steps of the  
85 pork production chain, including farms (n=17), slaughterhouses (n=16) and retail markets (n=10).  
86 Classification by serotype including *Salmonella enterica* serotypes Stanley (n=12), Typhimurium  
87 (n=10), Panama (n=6), Give (n=6), Krefeld (n=2), Kedougou (n=2), Anatum (n=1), Agona (n=1),  
88 Lexington (n=1), Newport (n=1) and Yoruba (n=1). Isolates were serotyped according to the WHO  
89 National *Salmonella* and *Shigella* Center Laboratory (NSSC) in Nonthaburi, Thailand using the slide  
90 agglutination method and serotypes were assigned according to the Kauffmann-White scheme  
91 (Brenner et al., 2000). Typing details for each isolate is shown in **Table 1**.

## 92 **2.2 Whole genome sequencing**

93 The DNA of all 43 *S. enterica* isolates were extracted using QIAamp DNA mini kits (Qiagen,  
94 Crawley, UK). The Nextera XT DNA Library Preparation Kit was used for the library preparation  
95 according to the manufacturer's instructions (Illumina, Cambridge, UK). *Salmonella* genomes were  
96 sequenced as short reads using an Illumina MiSeq 300 bp paired-end sequencer (Illumina,  
97 Cambridge, UK). Short reads were filtered, trimmed with TRIMMOMATIC (Bolger et al., 2014),  
98 and assembled *de novo* with SPAdes software (version 3.8.0, using the-careful command)  
99 (Bankevich et al., 2012). The average number of contigs was 341 (range: 89-2365) for an average  
100 total assembled sequence size of 4,918,241 bp (range: 4,169,306-5,234,359). The average N50 was  
101 38,380 (range: 2249-128,256) and the average GC content was 52.2% (range: 52.0-52.6). Short read  
102 data are available on the NCBI Sequence Read Archive, associated with BioProjects PRJNA573746  
103 and PRJNA419926 (<https://www.ncbi.nlm.nih.gov/sra>).

## 104 **2.3 Core genome multilocus sequence typing (cgMLST)**

105 Whole genome sequencing data of all 43 *S. enterica* isolates were uploaded to a Bacterial  
106 Isolate Genome Sequence Database (BIGSdb) and the genome comparator tool (constructed for the  
107 and provided by pubMLST) ([https://pubmlst.org/bigssdb?db=pubmlst\\_salmonella\\_isolates](https://pubmlst.org/bigssdb?db=pubmlst_salmonella_isolates)  
108 &page=plugin&name=GenomeComparator) used to assess gene presence among the isolates. The  
109 genome comparator tool analyzes all selected isolates using the EnteroBase *Salmonella* database's  
110 cgMLST scheme, which considers a total of 3002 loci. (Pearce et al., 2020)

111 To expand our collection, we included an additional 61 *S. enterica* isolates from public  
112 repositories: Enterobase *Salmonella enterica* WGS database ([https://enterobase.warwick.ac.uk](https://enterobase.warwick.ac.uk/species/index/senterica)  
113 /species/index/senterica) (Warwick Medical School; **Supplementary Table S1**). These additional  
114 genomes included isolates from different source reservoirs in Thailand during the period of 2001  
115 through 2016. Isolates were typed to *Salmonella enterica* serotypes Stanley (n=8), Typhimurium  
116 (n=21), Panama (n=2), Give (n=1), Anatum (n=8), Kedougou (n=9), Agona (n=7) and Lexington  
117 (n=5); from animals (2 wild animals, and 1 poultry), food (38 pork, 6 frozen seafood, 5 spices, 3  
118 foods and 2 vegetables), and human (n = 4). A minimum spanning tree of all isolates was  
119 constructed, based on advanced cluster analysis for categorical data of allelic number for cgMLST  
120 using Bionumerics version 7.6 (Applied Maths, Ghent, Belgium).

## 121 **2.4 Virulence genes and antimicrobial resistance genes investigation.**

122 We used the RASTtk algorithm (Brettin et al., 2015) to annotate whole genome sequencing  
123 data of all isolates via the PATRIC v3.6.12 annotation server using default parameters. (Wattam et  
124 al., 2017) (<https://patricbrc.org/app/Annotation>). The Virulence Factor Database (VFDB; database  
125 version 2019) (Liu et al., 2019) was used to define the presence of known virulence genes including  
126 adhesion effector, invasion effectors, intracellular survival effectors and toxin-producing genes.  
127 Antimicrobial resistance gene presence was explored using the Comprehensive Antibiotic Resistance  
128 Database (CARD; database version 2020) (Alcock et al., 2020). The antimicrobial resistance genes  
129 (AMR genes) related to the expression of aminoglycoside, beta-lactam, trimethoprim,  
130 fluoroquinolone, fosfomycin, macrolide, macrolide-lincosamide-streptogramin B, peptide, phenicol,  
131 sulfonamide, and tetracycline were investigated. The dendrogram of the virulence genes and  
132 antimicrobial resistance genes investigation were constructed using the unweighted pair group  
133 method with arithmetic mean (UPGMA) algorithms according to the cluster analysis of categorical  
134 values of genes concluded in this study.

### 135 **3 Results**

#### 136 **3.1 *S. enterica* serotypes differ in their ability survive through the pork production chain**

137 From the minimum spanning tree analysis, all *S. enterica* isolates tested were divided into 4  
138 major clusters with 9 additional singleton isolates (**Figure 1A**). According to the source of origin,  
139 isolates from farms and slaughterhouses were grouped together into the similar clusters. Conversely,  
140 most isolates recovered from retail markets (9/10) did not cluster with farm or slaughterhouse  
141 isolates. There was a single cluster that was comprised of isolates from all three sources of *S. enterica*  
142 isolates, supporting persistence of this serotype (*S. enterica* serotype Give) from the swine farm to  
143 slaughter and contamination of retail pork products (**Figure 1B**). This cluster was comprised solely  
144 of isolates collected in Chiang Mai and Lamphun province during the period of 2012-2014.

145 Some *Salmonella* isolates shared the same cgMLST profiles, including serotype  
146 Typhimurium isolates ID 8456 and 8457 – both recovered from farms in Lamphun province in the  
147 period of 2011; six serotype Stanley isolates (IDs: 8519, 8520, 8521, 8524, 8525, & 8526) recovered  
148 from slaughterhouses in Chiang Mai and Lamphun during the period of 2013; and two serotype  
149 Panama isolates (IDs: 8510 & 8511) from Chiang Mai which were recovered from slaughterhouse in  
150 2013 (**Figure 1**). In addition, some clonal isolates were able to persist between different production  
151 steps and time periods, including two serotype Stanley isolates (IDs: 8529 and 8530): collected from  
152 a farm in Lamphun in 2012, and a slaughterhouse in Chiang Mai in 2013, respectively. Two others

153 clonal serotype Give isolates were collected from slaughterhouses in different provincial areas during  
154 2013 (IDs: 8514 & 8515; **Figure 1**).

155 Notwithstanding *S. enterica* serotype Rissen and the monophasic Typhimurium, which are the  
156 most common serotypes identified in the northern Thai pork production chain, *S. enterica* serotypes  
157 Typhimurium, Stanley and Panama were the predominant serotypes recovered from farms and  
158 slaughterhouses. These *Salmonella* isolates were found in Chiang Mai and Lamphun Province during  
159 the period of 2011 through 2013. Other serotypes, including *S. enterica* serotypes Agona, Anatum,  
160 Krefeld, Kedougou, Lexington, Newport, and Yoruba were not grouped into any clusters and were  
161 isolated from sources in the retail markets in the Chiang Mai municipality area. *S. enterica* serotype  
162 Give was the only serotype that was found in all 3 different steps during 2012-2014\ (**Figure 1B**).

### 163 **3.2 Not all high-risk *S. enterica* isolates collected in the retail markets were from pork**

164 To better understand the genetic relatedness of isolates in our collection, we constructed a  
165 minimum spanning tree based on cgMLST profiles of our collected isolates (n=43), compared with  
166 all publicly available genomes from Thailand (n=61; **Supplementary Table S1**). In total, 104 *S.*  
167 *enterica* isolates were clustered according to their cgMLST profiles by their source of origin (**Figure**  
168 **2**), and there was a distinction in isolates from the farms and slaughterhouses and those collected in  
169 the retail markets. Isolates collected from the retail markets demonstrated greater diversity in  
170 cgMLST profiles (6 cgMLST clusters) and serotypes (7 Serotypes). Four cgMLST clusters and 4  
171 serotypes overlapped between the farms and slaughterhouses (**Supplementary Figure S1**). Many of  
172 the isolates collected in Chiang Mai municipality markets were of unique cgMLST profiles and  
173 serotypes that were not present in any of our pork production samples, instead grouping with clusters  
174 from other Thai food products, including spices, food, frozen seafood and pork. Although pork  
175 products are a frequent source of salmonellosis infection, they are not the only high-risk food product  
176 available in the retail markets. The limited number of clinical *S. enterica* isolates that were publicly  
177 available (n=4) clustered (same/similar cgMLST profile) predominantly with isolates identified in the  
178 pre-harvest steps of pork production (n=3), with only a single isolate clustering with isolates  
179 identified at retail markets (**Figure 2**). Given the low number of isolates compared it's difficult to  
180 draw robust conclusions but does suggest that isolates from the pork production industry are able to  
181 persist and pose a public health risk.

### 182 **3.3 Virulence gene profiling of *S. enterica* from the pork production chain**

183 Known virulence genes were identified in all isolates through nucleotide comparisons with  
184 the VFDB. All isolates carried the virulence genes encoding for host cell adhesion (*csg*, *fim*, *mis*,  
185 *sin*), host cell invasion (*che*, *flg*, *fli*, *inv*, *mot*, *omp*, *org*, *prg*, *sic*, *sif*, *sip*, *slr*, *sop*, *spa*, *spt*, *ssa*, *ssc*,  
186 *sse*) and intracellular survival (*ent*, *fep*, *gmh*, *iro*, *mgt*, *kds*, *mig*). The virulence genes were harbored  
187 in the *Salmonella* isolates regardless of serotype, production steps, year, and geographical area.  
188 However, serotype Give isolates seemed to contain alternative host adhesion genes (*fae* and *shd*) in  
189 place of the more common *lpf* and *rat* genes. We also identified *cdt* genes in these serotypes Give  
190 isolates (and serotype Panama), which are typically associated with *S. typhi* and encode for toxin  
191 production. This is particularly alarming as serotype Give isolates were able to persist through the  
192 pork production chain, and therefore these highly virulent genes were identified in isolates from  
193 farms, slaughterhouses, and retail markets (**Figure 3**).

194 Isolates were characterized according to presence of each of the 40 identified virulence genes  
195 and classified into 12 virulence profiles. Profiles 1 and 3 (16.27%) were the most frequently encoded  
196 profile, followed by profiles 2, 5 and 6 with 13.95% of frequency. Several genes were found only in  
197 specific sources, resulting in unique virulence profiles, including virulence profiles 9 (with *flh* genes  
198 isolated from the slaughterhouse), profiles 10 and 11 (with *gmd* and *tcp* genes isolated from the retail  
199 markets, respectively). There was also diversity in virulence profiles among serotypes and the  
200 different steps of the production chain. In another words, there are the less concordance between  
201 serotyping results and virulence profiles (**Figure 3**).

202 An intersection analysis of virulence genes demonstrated that 37 virulence genes were shared  
203 among the three steps of pork production. Many *Salmonella* isolates collected from the retail markets  
204 had the most virulence genes (39/40 virulence genes), followed by *Salmonella* isolates recovered  
205 from slaughterhouses and farms (38 and 37 virulence genes were identified, respectively)  
206 (**Supplementary Figure S2**).

### 207 **3.4 Widespread multidrug resistance in isolates from all steps of the pork production chain**

208 According to the heatmap analysis, all the *Salmonella* isolates in this study carried at least one  
209 antimicrobial resistance gene (ARG), and all of them were multi-drug resistant *Salmonella* –  
210 demonstrating putative resistance to three or more antimicrobial classes. Similar to the distribution of  
211 virulence genes, ARGs were predominantly lineage dependent - with isolates from the same serotype  
212 sharing similar ARG content, even across different isolation sources, time and geographical area. In

213 total, ten antimicrobial resistance genes were harbored in all *Salmonella* isolates, including *acrD*,  
214 *gyrA*, *mfd*, *parC*, *parE*, *glpT*, *murA*, *bacA*, *pmrC*, and *pmrE*, which contribute towards  
215 aminoglycoside, fluoroquinolone, fosfomycin, and peptide resistance, while CTX-M-14 and *erm*  
216 (42), which encoded for beta-lactam and macrolide-lincosamide-streptogramin B resistance, was not  
217 found in this study (**Figure 4**).

218 According to intersection analysis, twenty-four antimicrobial resistance genes were shared  
219 throughout all three pork production steps. Additionally, four antimicrobial resistance genes (*drfA12*,  
220 *QnrS1*, *florR* and *tetM*) were identified in isolates sampled from farms and slaughterhouses, which  
221 are linked to trimethoprim, fluoroquinolone, phenicol and tetracycline, respectively. The *Salmonella*  
222 isolates recovered from farms harbored the highest number of antimicrobial resistance genes (34/40  
223 ARGs), followed by the *Salmonella* isolates recovered from slaughterhouses and retail markets (30  
224 and 26 ARGs identified, respectively). Some ARGs were identified in specific sources of *Salmonella*  
225 isolates, including *AAC (3)-IIa*, *CTX-M-55*, *ErmB*, *MCR-1*, *catII* and *sulI* genes in farm isolates,  
226 while *TEM-12* and *TEM-141* genes were only found in slaughterhouses. Furthermore, *FosA2* and  
227 *mphA* were only found in *Salmonella* isolates that were on the retail markets. (**Supplementary**  
228 **Figure S3**)

## 229 **4 Discussion**

230 The most common *Salmonella* serotypes implicated in widespread contamination of the pork  
231 production chain in northern Thailand are monophasic Typhimurium and serotype Rissen. Previous  
232 genomics studies have focused on these common serotypes, with less common serotypes overlooked  
233 (Prasertsri et al., 2019; Patchanee et al., 2020). In this study we focus on these less common  
234 serotypes to investigate their genetic diversity and virulence potential. Isolates originating from farm  
235 and slaughterhouse were closely related, with isolates from serotypes Typhimurium, Panama, and  
236 Stanley collected from both production steps. This is consistent with previous studies suggesting that  
237 these serotypes are common at the pre-harvest level. (Sanguankiat et al., 2010; Niyomdecha et al.,  
238 2016). Together, these findings support the feasibility of *Salmonella* spreading from the farms to  
239 slaughterhouses via live animals (Rostagno & Callaway, 2012; Savall et al., 2016).

240 *S. enterica* serotype Give was the only serotype found at all three steps of the pork production  
241 chain. This serotype has previously been found in Thailand from diverse sources of food-animal  
242 production, including poultry, pork and other food products, such as chili powder (Wang et al., 2015;  
243 Phongaran et al., 2019). Another study implicated this serotype as the causative agent of



244 salmonellosis with a splenic abscess in a male patient who had travelled to southern Thailand and  
245 consumed raw minced pork (Girardin et al., 2006). Despite this, many isolates found primarily on the  
246 farms and in the slaughterhouses apparently pose no direct impact on consumers, i.e., they are not  
247 able to survive (or out compete other strains) to contaminate pork products sold at market. However,  
248 there is evidence that *S. enterica* serotypes found predominantly at the pre-harvest level can cause  
249 infection in workers at the operational level (Sringam et al., 2017). Estimates suggest that as many as  
250 43% of workers are colonized by *Salmonella*, compared to an overall prevalence of *Salmonella*  
251 contamination in farmed pigs of 52%. This suggests that transmission between pigs and humans is  
252 very common in the farm environment, with *S. enterica* serotype Typhimurium implicated as the  
253 primary infecting agent (Punpanich et al., 2012). *S. enterica* serotypes Stanley and Panama were also  
254 among the most common serotypes isolated from farms and slaughterhouses and have been  
255 recovered from the stool samples of salmonellosis patients in other studies (Pulford et al., 2019). The  
256 *S. enterica* isolates that we collected from retail markets were more diverse and represented several  
257 *Salmonella* serotypes.

258         Of the 10 samples we collected from the retail markets, we identified 8 different serotypes.  
259 There was little overlap between serotypes found in retail market isolates and those sampled on the  
260 farms or slaughterhouses. It is likely that this diversity, in both phenotypic and genotypic  
261 characteristics are due to the wider sources of contamination of retail products than the pork  
262 production industry (Chen et al., 2019). We identified a single isolate from the retail market samples  
263 that was from *S. enterica* serotype Anatum, which is typically one of the most common serotypes  
264 found in pork products in Thailand (Padungtod & Kaneene, 2006) - sometimes considered the 3<sup>rd</sup>  
265 most common serotype isolated from pork in Asia (Ferrari et al., 2019). Other serotypes, including  
266 Agona, Kedougou and Lexington are grouped in clusters with isolates from frozen seafood and  
267 spices in Thailand. Contamination with *Salmonella* from uncooked seafood products sold at market  
268 has been estimated at the rate of 21% (Woodring et al., 2012). However, these serotypes have been  
269 identified from multiple agricultural products and retail food products, including seafood, meat,  
270 spices, and herbs (Zhao et al., 2006). Spices such as clove, oregano, black pepper, red chili, and  
271 pepper powder have become important sources of *Salmonella* contamination, and have been  
272 implicated in foodborne outbreaks in several countries, e.g., contaminated fresh basil in Denmark;  
273 and herbal tea in Germany (Koch et al., 2005; Pakalniskiene et al., 2009). Cross-contamination  
274 between foodstuffs at the retail point cannot be discounted due to the remaining of *Salmonella* on the

275 food contact surface, which difficult to eradicate from the retail environment and facilities. (De  
276 Cesare et al., 2003; Campos et al., 2019).

277 Although some virulence genes were detected at low frequency, many of the virulence genes  
278 we identified were found in nearly all isolates, including those associated with host cell adhesion,  
279 invasion and intracellular survival (Jajere et al., 2019). Alarmingly, we also were able to identify  
280 cytolethal distending toxin genes (*cdt*) in a small number of isolates from serotypes Give and  
281 Panama. Typically, *cdt* genes are found in highly virulent *Salmonella* Typhi isolates, although there  
282 is precedence for their presence in non-typhoidal *Salmonella* (Haghjoo & Galan, 2004). Previous  
283 work has identified *cdt* genes in non-typhoidal *Salmonella* serotypes Javiana, Montevideo, and  
284 Oranienburg, and were implicated in their higher capability to persist and cause infection (Miller &  
285 Wiedmann, 2016). Virulence genes were found in all isolates at all steps of the pork production  
286 chain, timescale, or geographical area. Isolates from the same serotype shared similar virulence  
287 profiles, which transcended sampling source. This suggests that all isolates that we collected had the  
288 potential to colonize and infect humans, whether through direct consumption by consumers of retail  
289 food products or exposure of workers on the farms and slaughterhouses (Poonchareon et al., 2019).

290 The global rise in AMR pathogens is a significant public health risk and forecasts on death  
291 tolls resulting from AMR infections are shocking – with an estimated death toll of 10 million people  
292 by 2050, if no action is taken (Balouiri et al; 2016). Fluoroquinolone resistant *Salmonella* are among  
293 the WHO’s high priority organisms for development of new antibiotics (WHO, 2017). In our  
294 collection, all 43 isolates were multidrug resistant and resistant to at least three antimicrobial classes.  
295 Previous studies have identified widespread dissemination of MDR *Salmonella* throughout the pork  
296 production chain, with high prevalence (98%) in Thailand (Sinwat et al., 2016). Multi-drug resistant  
297 *Salmonella* have also been observed in the neighboring countries, including Laos (98.4%) and  
298 Cambodia (52%) (Trongjit et al., 2017). Isolates carried at least different 10 ARGs, associated with  
299 aminoglycoside, fluoroquinolone, fosfomycin, and peptide resistance. All antimicrobials where  
300 putative resistance was identified are widely used in veterinary practice, especially in swine  
301 production – where farmed swine are thought to consume more antimicrobials than any other  
302 livestock animal (Van et al., 2015; Nhung et al., 2016). The highest number of ARG was found in  
303 farm isolates, followed by the slaughterhouses and then the retail markets. Clearly, there is a strong  
304 selective pressure imposed by incongruous antimicrobial usage, evidenced here and in other studies  
305 by a high prevalence of AMR organisms (not just *Salmonella*) in industrially farmed swine (Harada  
306 & Asai, 2010; Tadee et al., 2015). Our findings support the bleak WHO outlook where a rise in

307 fluoroquinolone resistant organisms continues to erode the efficacy of antimicrobials for clinical  
308 cases and there is an urgent need to either curtail this rise; or develop novel antimicrobials (Lee et al.,  
309 2009).

310 The lack of strong regulation and indiscriminate use of antimicrobials has promoted  
311 dissemination of ARGs in the Thai food chain (Lekagul et al., 2021). As a result, the Department of  
312 Livestock Development, Ministry of Agriculture and cooperatives have implemented a ban on the  
313 use of any antimicrobials as a growth promoter in animal feed to combat antimicrobial resistance in  
314 livestock animals. Even though the government agency has already issued some policies for reducing  
315 the antimicrobial resistance pathogens' occurrence in the livestock section, some antimicrobial  
316 agents, including aminoglycoside and fluoroquinolone, are still available for treatment at the farm  
317 level (Nuangmek et al., 2021). Our findings indicate that multidrug resistant *Salmonella* are still a  
318 problem in the pork production chain, and larger scale surveillance studies are required.

## 319 **5 Conclusion**

320 In the Chiang Mai and Lamphun Municipality areas, *Salmonella* circulating in pork  
321 production is hazardous to humans in every step along the production chain. All of these isolates  
322 contained the necessary virulence genes for the pathogenicity of salmonellosis. In addition, the  
323 *Salmonella* isolates in this study were the multi-drug resistance *Salmonella* which harmful to the  
324 public health worldwide. In terms of epidemiological knowledge, there is less information about the  
325 less common serotypes of *Salmonella* in this study area. This study reveals the possible common  
326 ancestors of each *Salmonella* serotype and can provide additional information about the evidence of  
327 *Salmonella*'s cross-contamination at the pre-harvest level. Furthermore, the whole genome sequence-  
328 based analysis can substantiate the possibility of *Salmonella* contamination from other agricultural  
329 products to the pork at the retail level. Additional information from this study would motivate all  
330 stakeholders to be aware of and pay attention to the reinforcement of standardized sanitation  
331 throughout the pork production chain in order to eradicate and reduce the risk of *Salmonella*  
332 contamination, which affects public health worldwide.

## 333 **6 Author Contributions**

334 TE conceived and designed the experiments, performed the experiment, analyzed the data,  
335 prepared figures and/or tables, and approved the final draft. PT conceived and designed the  
336 experiments, prepared figures and/or tables, authored or reviewed drafts of the paper, and approved

337 the final draft. BP conceived and designed the experiments, performed the experiment, analyzed the  
338 data, and approved the final draft. PP conceived and designed the experiments, authored or reviewed  
339 drafts of the paper, and approved the final draft.

## 340 **7 Funding**

341 This research project is supported by National Research Council of Thailand (NRCT):  
342 NRCT5-RGJ63004-073. BP is funded by the Medical Research Council (MR/V001213/1) and  
343 National Institutes of Health (1R01AI158576-01).

## 344 **8 Acknowledgements**

345 All high-performance computing was performed on MRC CLIMB (supported by MRC grants  
346 MR/L015080/1 and MR/T030062/1). Finally, the authors would like to express our appreciation to  
347 our colleagues at Chiang Mai University for noteworthy contributions and partial funding support.

## 348 **9 References**

- 349 Alcock, B.P., Raphenya, A.R., Lau, T.T., Tsang, K.K., Bouchard, M., Edalatmand, A., Huynh, W.,  
350 Nguyen, A.L.V., Cheng, A.A., Liu, S. and Min, S.Y. (2020). CARD 2020: antibiotic resistance  
351 surveillance with the comprehensive antibiotic resistance database. *Nucleic acids*  
352 *research*, 48(D1), D517-D525.
- 353 Balouiri, M., Sadiki, M. and Ibsouda, S.K. (2016). Methods for in vitro evaluating antimicrobial  
354 activity: A review. *Journal of pharmaceutical analysis*, 6(2), 71-79.
- 355 Bankevich, A., Nurk, S., Antipov, D., Gurevich, A.A., Dvorkin, M., Kulikov, A.S., Lesin, V.M.,  
356 Nikolenko, S.I., Pham, S., Prjibelski, A.D. and Pyshkin, A.V. (2012). SPAdes: a new genome  
357 assembly algorithm and its applications to single-cell sequencing. *Journal of computational*  
358 *biology*, 19(5), 455-477.
- 359 Brenner, F.W., Villar, R.G., Angulo, F.J., Tauxe, R. and Swaminathan, B. (2000). *Salmonella*  
360 nomenclature. *Journal of clinical microbiology*, 38(7), 2465-2467.
- 361 Brettin, T., Davis, J.J., Disz, T., Edwards, R.A., Gerdes, S., Olsen, G.J., Olson, R., Overbeek, R.,  
362 Parrello, B., Pusch, G.D. and Shukla, M. (2015). RASTtk: a modular and extensible  
363 implementation of the RAST algorithm for building custom annotation pipelines and  
364 annotating batches of genomes. *Scientific reports*, 5(1), 1-6.

- 365 Bolger, A.M., Lohse, M. and Usadel, B. (2014). Trimmomatic: a flexible trimmer for Illumina  
366 sequence data. *Bioinformatics*, 30(15), 2114-2120.
- 367 Bureau of Epidemiology. (2018). Annual epidemiological surveillance report.  
368 [https://apps.doe.moph.go.th/boeeng/download/AW\\_Annual\\_Mix%206212\\_14\\_r1.pdf](https://apps.doe.moph.go.th/boeeng/download/AW_Annual_Mix%206212_14_r1.pdf)  
369 [Accessed April 20, 2021].
- 370 Campioni, F., Bergamini, A.M.M. and Falcão, J.P. (2012). Genetic diversity, virulence genes and  
371 antimicrobial resistance of *Salmonella* Enteritidis isolated from food and humans over a 24-  
372 year period in Brazil. *Food Microbiology*, 32(2), 254-264.
- 373 Campos, J., Mourão, J., Peixe, L. and Antunes, P. (2019). Non-typhoidal *Salmonella* in the pig  
374 production chain: a comprehensive analysis of its impact on human health. *Pathogens*, 8(1), 19.
- 375 Center of Disease Control and Prevention. (2021). *Salmonella*. U.S. Department of Health and  
376 Human Services, CDC. <https://www.cdc.gov/salmonella/index.html>. [Accessed April 20,  
377 2021].
- 378 Chen, H.M., Wang, Y., Su, L.H. and Chiu, C.H. (2013). Nontyphoid *Salmonella* infection:  
379 microbiology, clinical features, and antimicrobial therapy. *Pediatrics & Neonatology*, 54(3),  
380 147-152.
- 381 Chen, T., Jiang, J., Ye, C., Xie, J., Chen, X., Xu, D., Zeng, Z., Peng, Y., Hu, D.L. and Fang, R.  
382 (2019). Genotypic characterization and antimicrobial resistance profile of *Salmonella* isolated  
383 from chicken, pork and the environment at abattoirs and supermarkets in Chongqing, China.  
384 *BMC Veterinary Research*, 15(1), 1-8.
- 385 De Cesare, A., Sheldon, B.W., Smith, K.S. and Jaykus, L.A. (2003). Survival and persistence of  
386 *Campylobacter* and *Salmonella* species under various organic loads on food contact surfaces.  
387 *Journal of food protection*, 66(9), 1587-1594.
- 388 Ferrari, R.G., Rosario, D.K., Cunha-Neto, A., Mano, S.B., Figueiredo, E.E. and Conte-Junior, C.A.  
389 (2019). Worldwide epidemiology of *Salmonella* serovars in animal-based foods: a meta-  
390 analysis. *Applied and environmental microbiology*, 85(14), e00591-19.

- 391 Ferri, M., Ranucci, E., Romagnoli, P. and Giaccone, V. (2017). Antimicrobial resistance: A global  
392 emerging threat to public health systems. *Critical reviews in food science and nutrition*, 57(13),  
393 2857-2876.
- 394 Girardin, F., Mezger, N., Hächler, H. and Bovier, P.A. (2006). *Salmonella* serovar Give: an unusual  
395 pathogen causing splenic abscess. *European Journal of Clinical Microbiology and Infectious*  
396 *Diseases*, 25(4), 272-274.
- 397 Haghjoo, E. and Galán, J.E. (2004). *Salmonella typhi* encodes a functional cytolethal distending  
398 toxin that is delivered into host cells by a bacterial-internalization pathway. *Proceedings of the*  
399 *National Academy of Sciences*, 101(13), 4614-4619.
- 400 Harada, K. and Asai, T. (2010). Role of antimicrobial selective pressure and secondary factors on  
401 antimicrobial resistance prevalence in *Escherichia coli* from food-producing animals in Japan.  
402 *Journal of biomedicine and biotechnology*, 2010.
- 403 Jajere, S.M. (2019). A review of *Salmonella enterica* with particular focus on the pathogenicity and  
404 virulence factors, host specificity and antimicrobial resistance including multidrug resistance.  
405 *Veterinary world*, 12(4), 504.
- 406 Kintz, E., Davies, M.R., Hammarlöf, D.L., Canals, R., Hinton, J.C. and van der Woude, M.W.  
407 (2015). A BTP 1 prophage gene present in invasive non-typhoidal *Salmonella* determines  
408 composition and length of the O-antigen of the lipopolysaccharide. *Molecular microbiology*,  
409 96(2), 263-275.
- 410 Koch, J., Schrauder, A., Alpers, K., Werber, D., Frank, C., Prager, R., Rabsch, W., Broll, S., Feil, F.,  
411 Roggentin, P. and Bockemühl, J. (2005). *Salmonella* Agona outbreak from contaminated  
412 aniseed, Germany. *Emerging infectious diseases*, 11(7), 1124.
- 413 Lee, H.Y., Su, L.H., Tsai, M.H., Kim, S.W., Chang, H.H., Jung, S.I., Park, K.H., Perera, J., Carlos,  
414 C., Tan, B.H. and Kumarasinghe, G. (2009). High rate of reduced susceptibility to  
415 ciprofloxacin and ceftriaxone among nontyphoid *Salmonella* clinical isolates in Asia.  
416 *Antimicrobial Agents and Chemotherapy*, 53(6), 2696-2699.

- 417 Lekagul, A., Tangcharoensathien, V., Liverani, M., Mills, A., Rushton, J. and Yeung, S. (2021).  
418 Understanding antibiotic use for pig farming in Thailand: a qualitative study. *Antimicrobial*  
419 *Resistance & Infection Control*, 10(1), 1-11.
- 420 Liu, B., Zheng, D., Jin, Q., Chen, L. and Yang, J. (2019). VFDB 2019: a comparative pathogenomic  
421 platform with an interactive web interface. *Nucleic acids research*, 47(D1), D687-D692.
- 422 Miller, R. A., and Wiedmann, M. (2016). The cytolethal distending toxin produced by nontyphoidal  
423 *Salmonella* serotypes Javiana, Montevideo, Oranienburg, and Mississippi induces DNA  
424 damage in a manner similar to that of serotype Typhi. *MBio*, 7(6), e02109-16.
- 425 Nhung, N. T., Cuong, N. V., Thwaites, G., and Carrique-Mas, J. (2016). Antimicrobial usage and  
426 antimicrobial resistance in animal production in Southeast Asia: a review. *Antibiotics*, 5(4), 37.
- 427 Niyomdecha, N., Mungkornkaew, N., and Samosornsuk, W. (2016). Serotypes and antimicrobial  
428 resistance of *Salmonella* enterica isolated from pork, chicken meat and lettuce, Bangkok and  
429 central Thailand. *Southeast Asian Journal of Tropical Medicine and Public Health*, 47(1), 31.
- 430 Nuangmek, A., Rojanasthien, S., Yamsakul, P., Tadee, P., Eiamsam-ang, T., Thamlikitkul, V.,  
431 Tansakul, N., Suwan, M., Prasertsee, T., Chotinun, S. and Patchanee, P. (2021). Perspectives  
432 on antimicrobial use in pig and layer farms in Thailand: legislation, policy, regulations and  
433 potential. *Veterinary Integrative Sciences*, 19(1), 1-21.
- 434 Oakeson, K. F., Wagner, J. M., Mendenhall, M., Rohrwasser, A., and Atkinson-Dunn, R. (2017).  
435 Bioinformatic analyses of whole-genome sequence data in a public health laboratory. *Emerging*  
436 *infectious diseases*, 23(9), 1441.
- 437 Padungtod, P., and Kaneene, J. B. (2006). *Salmonella* in food animals and humans in northern  
438 Thailand. *International Journal of Food Microbiology*, 108(3), 346-354.
- 439 Pakalniskiene, J., Falkenhorst, G., Lisby, M., Madsen, S.B., Olsen, K.E.P., Nielsen, E.M., Mygh, A.,  
440 Boel, J. and Mølbak, K. (2009). A foodborne outbreak of enterotoxigenic *E. coli* and  
441 *Salmonella* Anatum infection after a high-school dinner in Denmark, November 2006.  
442 *Epidemiology & Infection*, 137(3), 396-401.

- 443 Patchanee, P., Tanamai, P., Tadee, P., Hitchings, M.D., Calland, J.K., Sheppard, S.K., Meunsene, D.,  
444 Pascoe, B. and Tadee, P. (2020). Whole-genome characterization of multidrug resistant  
445 monophasic variants of *Salmonella* Typhimurium from pig production in Thailand. *PeerJ*, 8,  
446 e9700.
- 447 Patchanee, P., Tansiricharoenkul, K., Buawiratlert, T., Wiratsudakul, A., Angchokchatchawal, K.,  
448 Yamsakul, P., Yano, T., Boonkhot, P., Rojanasatien, S. and Tadee, P. (2016). *Salmonella* in  
449 pork retail outlets and dissemination of its pulsotypes through pig production chain in Chiang  
450 Mai and surrounding areas, Thailand. *Preventive veterinary medicine*, 130, 99-105.
- 451 Pearce, M. E., Chattaway, M. A., Grant, K., and Maiden, M. C. (2020). A proposed core genome  
452 scheme for analyses of the *Salmonella* genus. *Genomics*, 112(1), 371-378.
- 453 Phongaran, D., Khang-Air, S., and Angkititrakul, S. (2019). Molecular epidemiology and  
454 antimicrobial resistance of *Salmonella* isolates from broilers and pigs in Thailand. *Veterinary*  
455 *world*, 12(8), 1311.
- 456 Poonchareon, K., Pulsrikarn, C., Nuanmuang, N., and Khamai, P. (2019). Effectiveness of BOX-PCR  
457 in differentiating genetic relatedness among *Salmonella* enterica serotype 4,[5], 12: i - isolates  
458 from hospitalized patients and minced pork samples in northern Thailand. *International journal*  
459 *of microbiology*, 2019.
- 460 Prasertsee, T., Chuammitri, P., Deeudom, M., Chokesajjawatee, N., Santiyanont, P., Tadee, P.,  
461 Nuangmek, A., Tadee, P., Sheppard, S.K., Pascoe, B. and Patchanee, P. (2019). Core genome  
462 sequence analysis to characterize *Salmonella enterica* serovar Rissen ST469 from a swine  
463 production chain. *International journal of food microbiology*, 304, 68-74.
- 464 Pulford, C. V., Perez-Sepulveda, B. M., Rodwell, E. V., Weill, F. X., Baker, K. S., and Hinton, J. C.  
465 (2019). *Salmonella* enterica serovar Panama, an understudied serovar responsible for  
466 extraintestinal salmonellosis worldwide. *Infection and immunity*, 87(9), e00273-19.
- 467 Punpanich, W., Netsawang, S., and Thippated, C. (2012). Invasive salmonellosis in urban Thai  
468 children: a ten-year review. *The Pediatric infectious disease journal*, 31(8), e105-e110.
- 469 Rostagno, M. H., and Callaway, T. R. (2012). Pre-harvest risk factors for *Salmonella* enterica in pork  
470 production. *Food Research International*, 45(2), 634-640.



- 471 Saha, P., Xiao, X., Yeoh, B.S., Chen, Q., Katkere, B., Kirimanjeswara, G.S. and Vijay-Kumar, M.  
472 (2019). The bacterial siderophore enterobactin confers survival advantage to *Salmonella* in  
473 macrophages. *Gut Microbes*, 10(3), 412-423.
- 474 Sanguankiat, A., Pinthong, R., Padungtod, P., Baumann, M.P., Zessin, K.H., Srikijakarn, L. and  
475 Fries, R. (2010). A cross-sectional study of *Salmonella* in pork products in Chiang Mai,  
476 Thailand. *Foodborne Pathogens and Disease*, 7(8), 873-878.
- 477 Savall, J. F., Bidot, C., Leblanc-Maridor, M., Belloc, C., and Touzeau, S. (2016). Modelling  
478 *Salmonella* transmission among pigs from farm to slaughterhouse: interplay between  
479 management variability and epidemiological uncertainty. *International journal of food*  
480 *microbiology*, 229, 33-43.
- 481 Sinwat, N., Angkittitrakul, S., Coulson, K. F., Pilapil, F. M. I. R., Meunsene, D., and Chuanchuen, R.  
482 (2016). High prevalence and molecular characteristics of multidrug-resistant *Salmonella* in  
483 pigs, pork and humans in Thailand and Laos provinces. *Journal of medical microbiology*,  
484 65(10), 1182-1193.
- 485 Sringam, P., Tungtanatanich, P., Suwannachot, P., Suksawat, F., Khang-Air, S., and Angkititrakul, S.  
486 (2017). MOLECULAR EPIDEMIOLOGY AND ANTIBIOGRAM OF *SALMONELLA*  
487 ISOLATES FROM HUMANS, SWINE AND PORK. *Southeast Asian Journal of Tropical*  
488 *Medicine and Public Health*, 48(5), 1017-1028.
- 489 Tadee, P., Boonkhot, P., and Patchanee, P. (2014). Quantification of contamination levels and  
490 particular risk of *Salmonella* spp. in pigs in slaughterhouses in Chiang Mai and Lamphun  
491 provinces, Thailand. *Japanese Journal of Veterinary Research*, 62(4), 171-179.
- 492 Tadee, P., Boonkhot, P., Pornruangwong, S., and Patchanee, P. (2015). Comparative phenotypic and  
493 genotypic characterization of *Salmonella* spp. in pig farms and slaughterhouses in two  
494 provinces in northern Thailand. *PloS one*, 10(2), e0116581.
- 495 Trongjit, S., Angkititrakul, S., Tuttle, R. E., Pongseree, J., Padungtod, P., and Chuanchuen, R.  
496 (2017). Prevalence and antimicrobial resistance in *Salmonella* enterica isolated from broiler  
497 chickens, pigs and meat products in Thailand–Cambodia border provinces. *Microbiology and*  
498 *immunology*, 61(1), 23-33.

- 499 Van Boeckel, T.P., Brower, C., Gilbert, M., Grenfell, B.T., Levin, S.A., Robinson, T.P., Teillant, A.  
500 and Laxminarayan, R. (2015). Global trends in antimicrobial use in food animals. *Proceedings*  
501 *of the National Academy of Sciences*, 112(18), 5649-5654.
- 502 Wang, H., Chen, Y., Ayers, S., Melka, D., Laasri, A., Payne, J.S., Zheng, J., Son, I., Timme, R.,  
503 Kastanis, G. and Hammack, T.S. (2015). Draft genome sequence of *Salmonella enterica* subsp.  
504 *enterica* serovar Give, isolated from an imported chili powder product. *Genome*  
505 *Announcements*, 3(4), e00726-15.
- 506 Wang, M., Qazi, I.H., Wang, L., Zhou, G. and Han, H. (2020). *Salmonella* virulence and immune  
507 escape. *Microorganisms*, 8(3), 407.
- 508 Warwick Medical School, n.d. *Salmonella enterica* Whole Genome Sequencing Database.  
509 [https://enterobase.warwick.ac.uk/species/senterica/search\\_strains](https://enterobase.warwick.ac.uk/species/senterica/search_strains). [Accessed October 26, 2021]
- 510 Wattam, A.R., Davis, J.J., Assaf, R., Boisvert, S., Brettin, T., Bun, C., Conrad, N., Dietrich, E.M.,  
511 Disz, T., Gabbard, J.L. and Gerdes, S. (2017). Improvements to PATRIC, the all-bacterial  
512 bioinformatics database and analysis resource center. *Nucleic acids research*, 45(D1), D535-  
513 D542.
- 514 World Health Organization. (2017). WHO publishes list of bacteria for which new antibiotics are  
515 urgently needed. [https://www.who.int/news/item/27-02-2017-who-publishes-list-of-bacteria-](https://www.who.int/news/item/27-02-2017-who-publishes-list-of-bacteria-for-which-new-antibiotics-are-urgently-needed)  
516 [for-which-new-antibiotics-are-urgently-needed](https://www.who.int/news/item/27-02-2017-who-publishes-list-of-bacteria-for-which-new-antibiotics-are-urgently-needed) [Accessed May 15, 2021].
- 517 Woodring, J., Srijan, A., Puripunyakom, P., Oransathid, W., Wongstitwilairoong, B., and Mason, C.  
518 (2012). Prevalence and antimicrobial susceptibilities of *Vibrio*, *Salmonella*, and *Aeromonas*  
519 isolates from various uncooked seafoods in Thailand. *Journal of food protection*, 75(1), 41-47.
- 520 Zhao, S., McDermott, P.F., Friedman, S., Qaiyumi, S., Abbott, J., Kiessling, C., Ayers, S., Singh, R.,  
521 Hubert, S., Sofos, J. and White, D.G. (2006). Characterization of antimicrobial-resistant  
522 *Salmonella* isolated from imported foods. *Journal of food protection*, 69(3), 500-507.

## 523 **10 Data Availability Statement**

524 The datasets analyzed for this study can be found in the NCBI associated with the Bio project:  
525 PRJNA573746 and PRJNA419926.

526 Table 1: Origin and characteristic of *S. enterica* isolates tested recovered from farms, slaughterhouses  
 527 and retail markets during the period of 2011-2014.

| <b>ID</b>   | <b>Serotype</b> | <b>Year</b> | <b>Source</b>  | <b>Province</b> |
|-------------|-----------------|-------------|----------------|-----------------|
| <b>8440</b> | S. Typhimurium  | 2011        | Farm           | Chiang Mai      |
| <b>8448</b> | S. Typhimurium  | 2011        | Farm           | Chiang Mai      |
| <b>8453</b> | S. Typhimurium  | 2011        | Farm           | Lamphun         |
| <b>8454</b> | S. Typhimurium  | 2011        | Farm           | Lamphun         |
| <b>8455</b> | S. Typhimurium  | 2011        | Farm           | Chiang Mai      |
| <b>8456</b> | S. Typhimurium  | 2011        | Farm           | Lamphun         |
| <b>8457</b> | S. Typhimurium  | 2011        | Farm           | Lamphun         |
| <b>8458</b> | S. Typhimurium  | 2011        | Farm           | Lamphun         |
| <b>8464</b> | S. Typhimurium  | 2011        | Farm           | Lamphun         |
| <b>8512</b> | S. Panama       | 2011        | Farm           | Lamphun         |
| <b>8513</b> | S. Panama       | 2012        | Farm           | Lamphun         |
| <b>8516</b> | S. Give         | 2012        | Farm           | Chiang Mai      |
| <b>8517</b> | S. Give         | 2012        | Farm           | Chiang Mai      |
| <b>8518</b> | S. Give         | 2012        | Farm           | Chiang Mai      |
| <b>8522</b> | S. Stanley      | 2012        | Farm           | Lamphun         |
| <b>8527</b> | S. Stanley      | 2011        | Farm           | Lamphun         |
| <b>8529</b> | S. Stanley      | 2012        | Farm           | Lamphun         |
| <b>8459</b> | S. Typhimurium  | 2013        | Slaughterhouse | Lamphun         |
| <b>8508</b> | S. Panama       | 2013        | Slaughterhouse | Chiang Mai      |
| <b>8509</b> | S. Panama       | 2013        | Slaughterhouse | Chiang Mai      |
| <b>8510</b> | S. Panama       | 2013        | Slaughterhouse | Chiang Mai      |
| <b>8511</b> | S. Panama       | 2013        | Slaughterhouse | Chiang Mai      |
| <b>8514</b> | S. Give         | 2013        | Slaughterhouse | Lamphun         |
| <b>8515</b> | S. Give         | 2013        | Slaughterhouse | Chiang Mai      |
| <b>8519</b> | S. Stanley      | 2013        | Slaughterhouse | Lamphun         |
| <b>8520</b> | S. Stanley      | 2013        | Slaughterhouse | Lamphun         |
| <b>8521</b> | S. Stanley      | 2013        | Slaughterhouse | Lamphun         |
| <b>8524</b> | S. Stanley      | 2013        | Slaughterhouse | Lamphun         |
| <b>8525</b> | S. Stanley      | 2013        | Slaughterhouse | Lamphun         |

| <b>ID</b> | <b>Serotype</b> | <b>Year</b> | <b>Source</b>  | <b>Province</b> |
|-----------|-----------------|-------------|----------------|-----------------|
| 8526      | S. Stanley      | 2013        | Slaughterhouse | Chiang Mai      |
| 8528      | S. Stanley      | 2013        | Slaughterhouse | Chiang Mai      |
| 8530      | S. Stanley      | 2013        | Slaughterhouse | Chiang Mai      |
| 8531      | S. Stanley      | 2013        | Slaughterhouse | Chiang Mai      |
| 8425      | S. Anatum       | 2014        | Market         | Chiang Mai      |
| 8431      | S. Krefeld      | 2014        | Market         | Chiang Mai      |
| 8434      | S. Kedougou     | 2014        | Market         | Chiang Mai      |
| 8436      | S. Krefeld      | 2014        | Market         | Chiang Mai      |
| 8438      | S. Newport      | 2014        | Market         | Chiang Mai      |
| 8872      | S. Lexington    | 2014        | Market         | Chiang Mai      |
| 8877      | S. Kedougou     | 2014        | Market         | Chiang Mai      |
| 8878      | S. Agona        | 2014        | Market         | Chiang Mai      |
| 8879      | S. Yoruba       | 2014        | Market         | Chiang Mai      |
| 8883      | S. Give         | 2014        | Market         | Chiang Mai      |

529 Figure 1: The minimum spanning tree (MST) analysis of *Salmonella* isolates recovered from the pork  
530 production chain. Each isolate was grouped according to the loci different of cgMLST scheme. (A):  
531 Node color coding: green color, yellow color and pink color represent the *Salmonella* isolates  
532 recovered from farm, slaughterhouse and retail market, respectively. (B): Node color coding: each  
533 color represents each serotype of *Salmonella* isolates.

534 Figure 2: The minimum spanning tree (MST) analysis of 43 *Salmonella* isolates recovered from pork  
535 production chain (striped nodes) and additional 61 *Salmonella* isolates circulating in Thailand. Node  
536 color coding were representing the sources of the *Salmonella* isolates.

537 Figure 3: Binary heatmap analysis of virulence genes harbored in the *Salmonella* isolates recovered  
538 from 3 production steps circulating in Chiang Mai and Lamphun municipality area during the period  
539 2011-2014.

540 Figure 4: Binary heatmap analysis of antimicrobial resistance genes harbored in the *Salmonella*  
541 isolates recovered from 3 production steps circulating in Chiang Mai and Lamphun municipality area  
542 during the period 2011-2014.

543 Supplementary Figure S1: The minimum spanning tree (MST) analysis of 43 *Salmonella* isolates  
544 recovered from pork production chain (striped nodes) and additional 61 *Salmonella* isolates  
545 circulating in Thailand. Node color coding were representing the serotypes of the *Salmonella*  
546 isolates.

547 Supplementary Figure S2: The Venn diagram of intersection analysis of virulence genes among  
548 different steps of pork production chain. The Venn diagram represent the number of unique and  
549 shared virulence genes in 43 *Salmonella* isolates recovered from farms, slaughterhouses and retail  
550 markets.

551 Supplementary Figure S3: The Venn diagram of intersection analysis of antimicrobial resistance  
552 genes among different steps of the pork production chain. The Venn diagram represents the number  
553 of unique and shared antimicrobial resistance genes in 43 *Salmonella* isolates recovered from farms,  
554 slaughterhouses, and retail markets.

555 Supplementary Table S1: Origin and characteristic of *S. enterica* isolates originating from various  
556 sources in Thailand during the period of 2001 through 2016 acquired from public repositories  
557 (Enterobase *Salmonella* database).



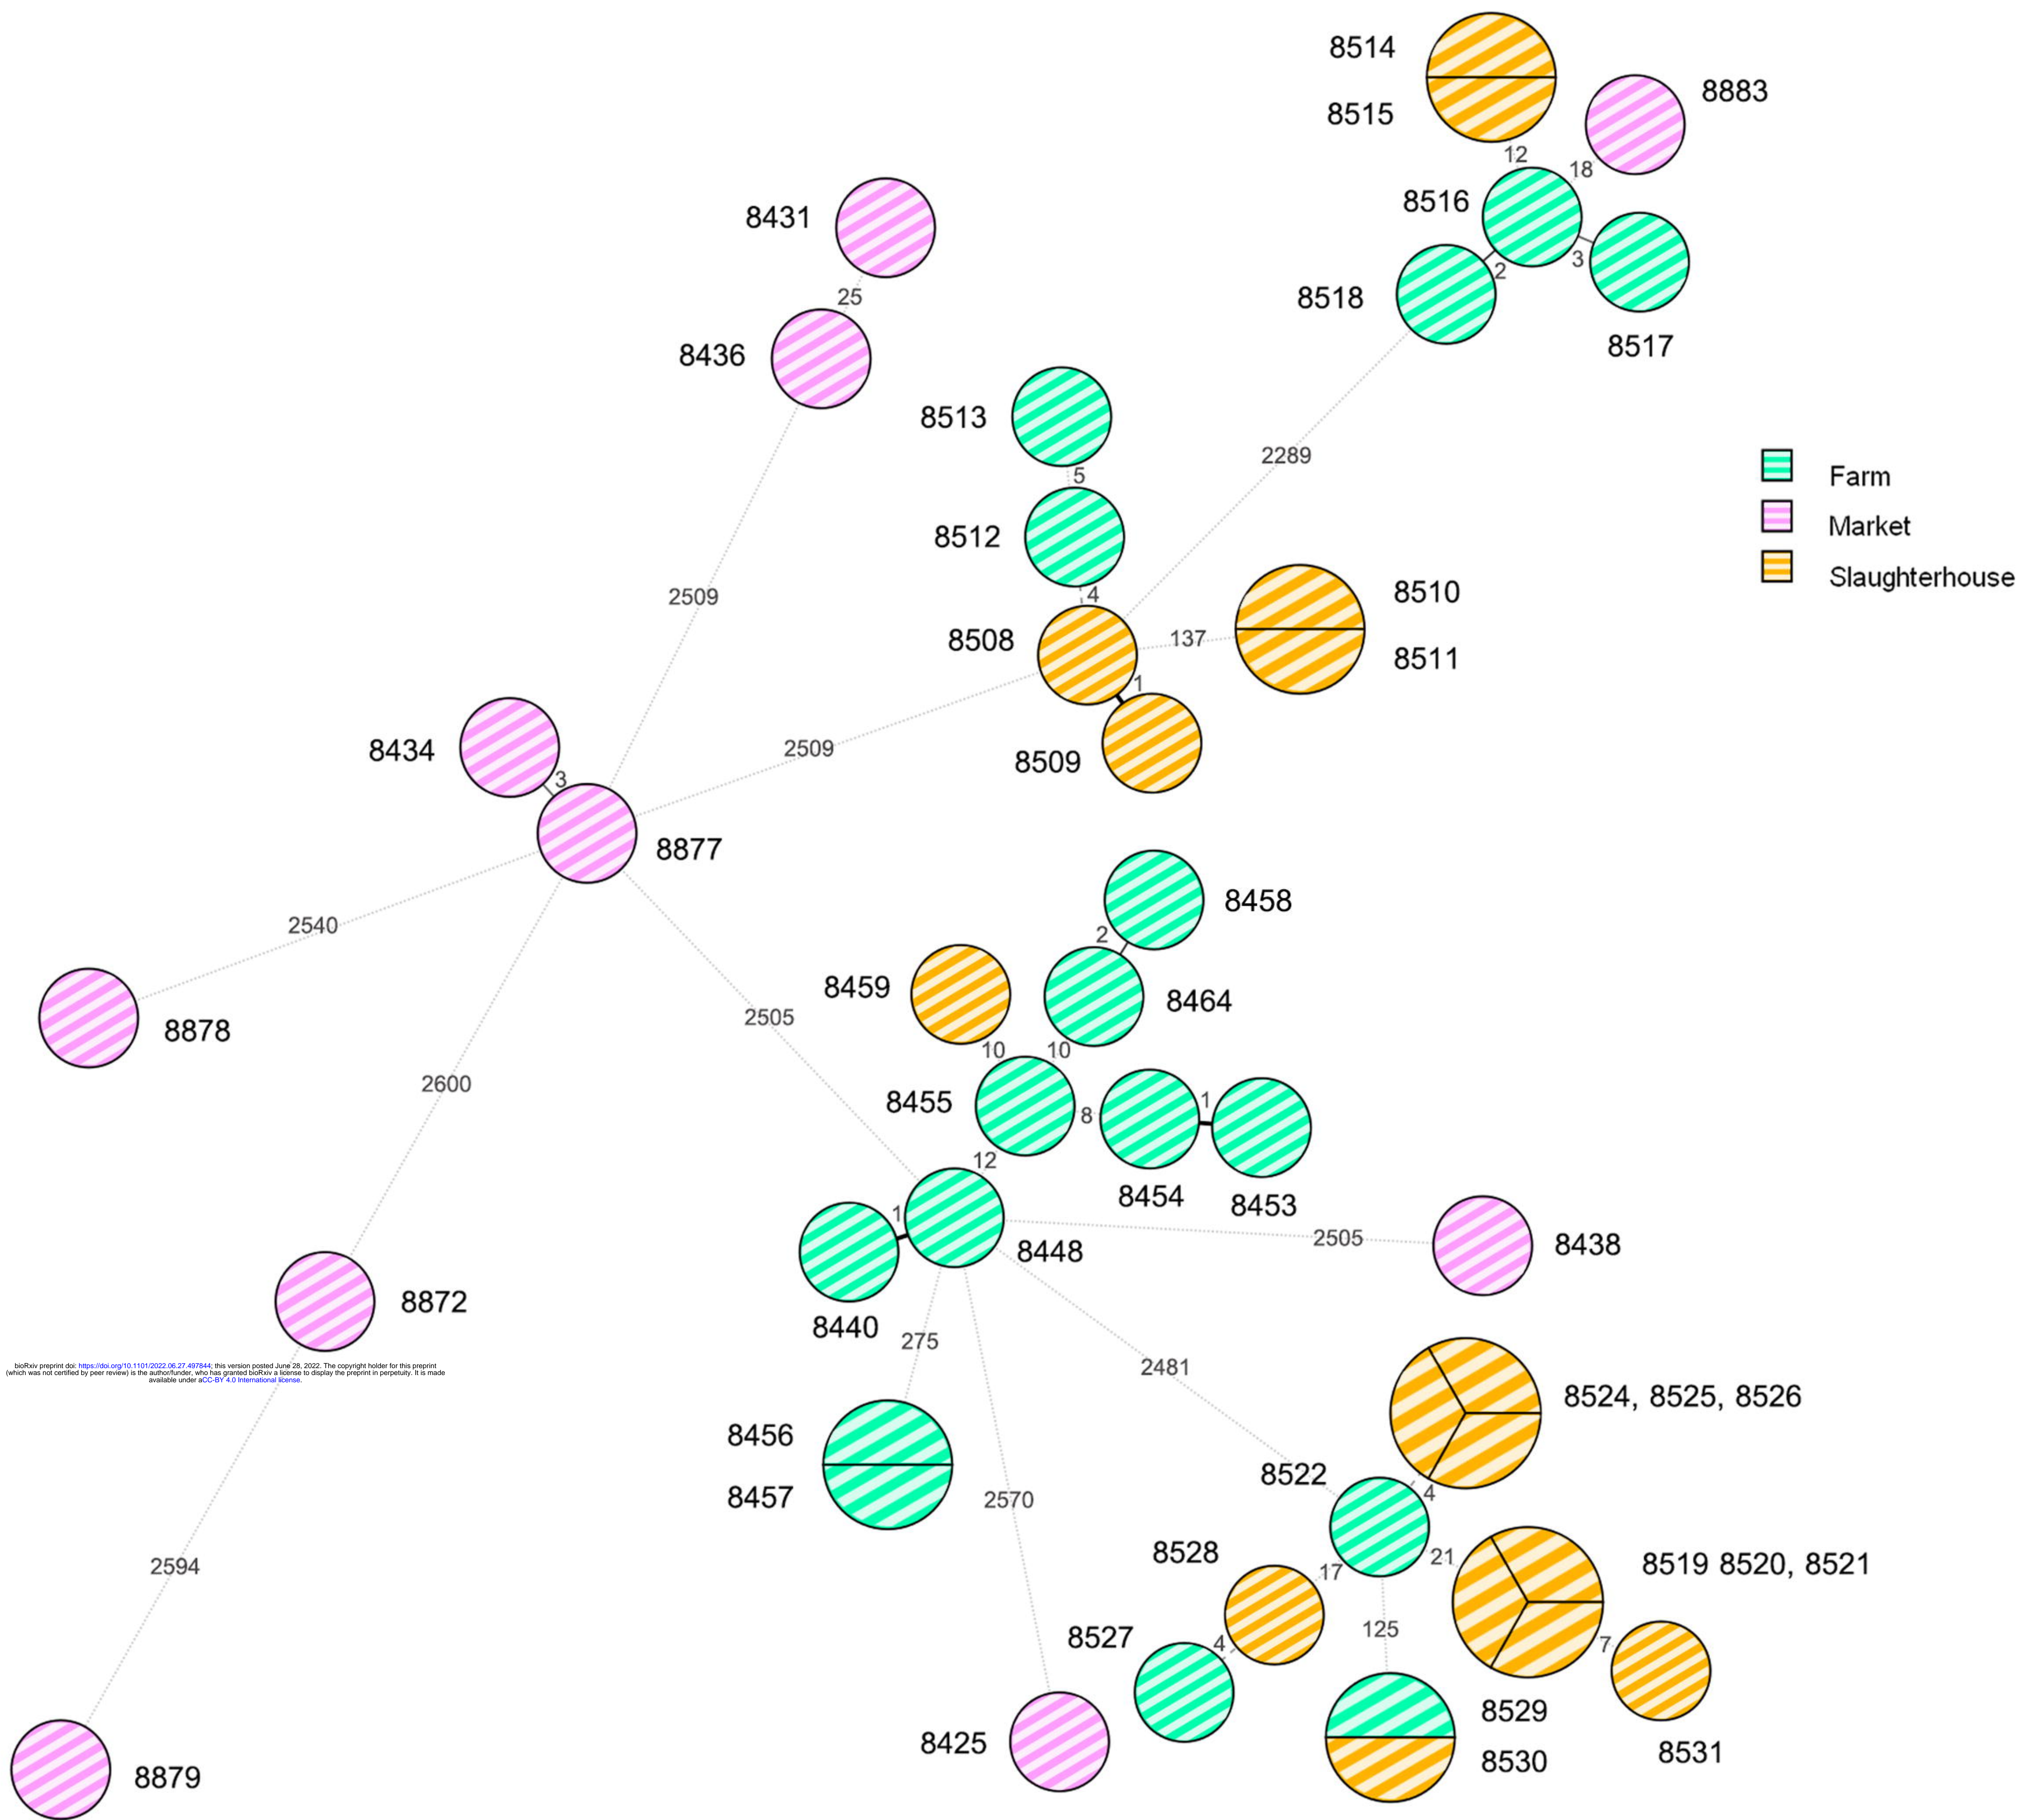

bioRxiv preprint doi: <https://doi.org/10.1101/2022.06.27.497844>; this version posted June 28, 2022. The copyright holder for this preprint (which was not certified by peer review) is the author/funder, who has granted bioRxiv a license to display the preprint in perpetuity. It is made available under aCC-BY 4.0 International license.

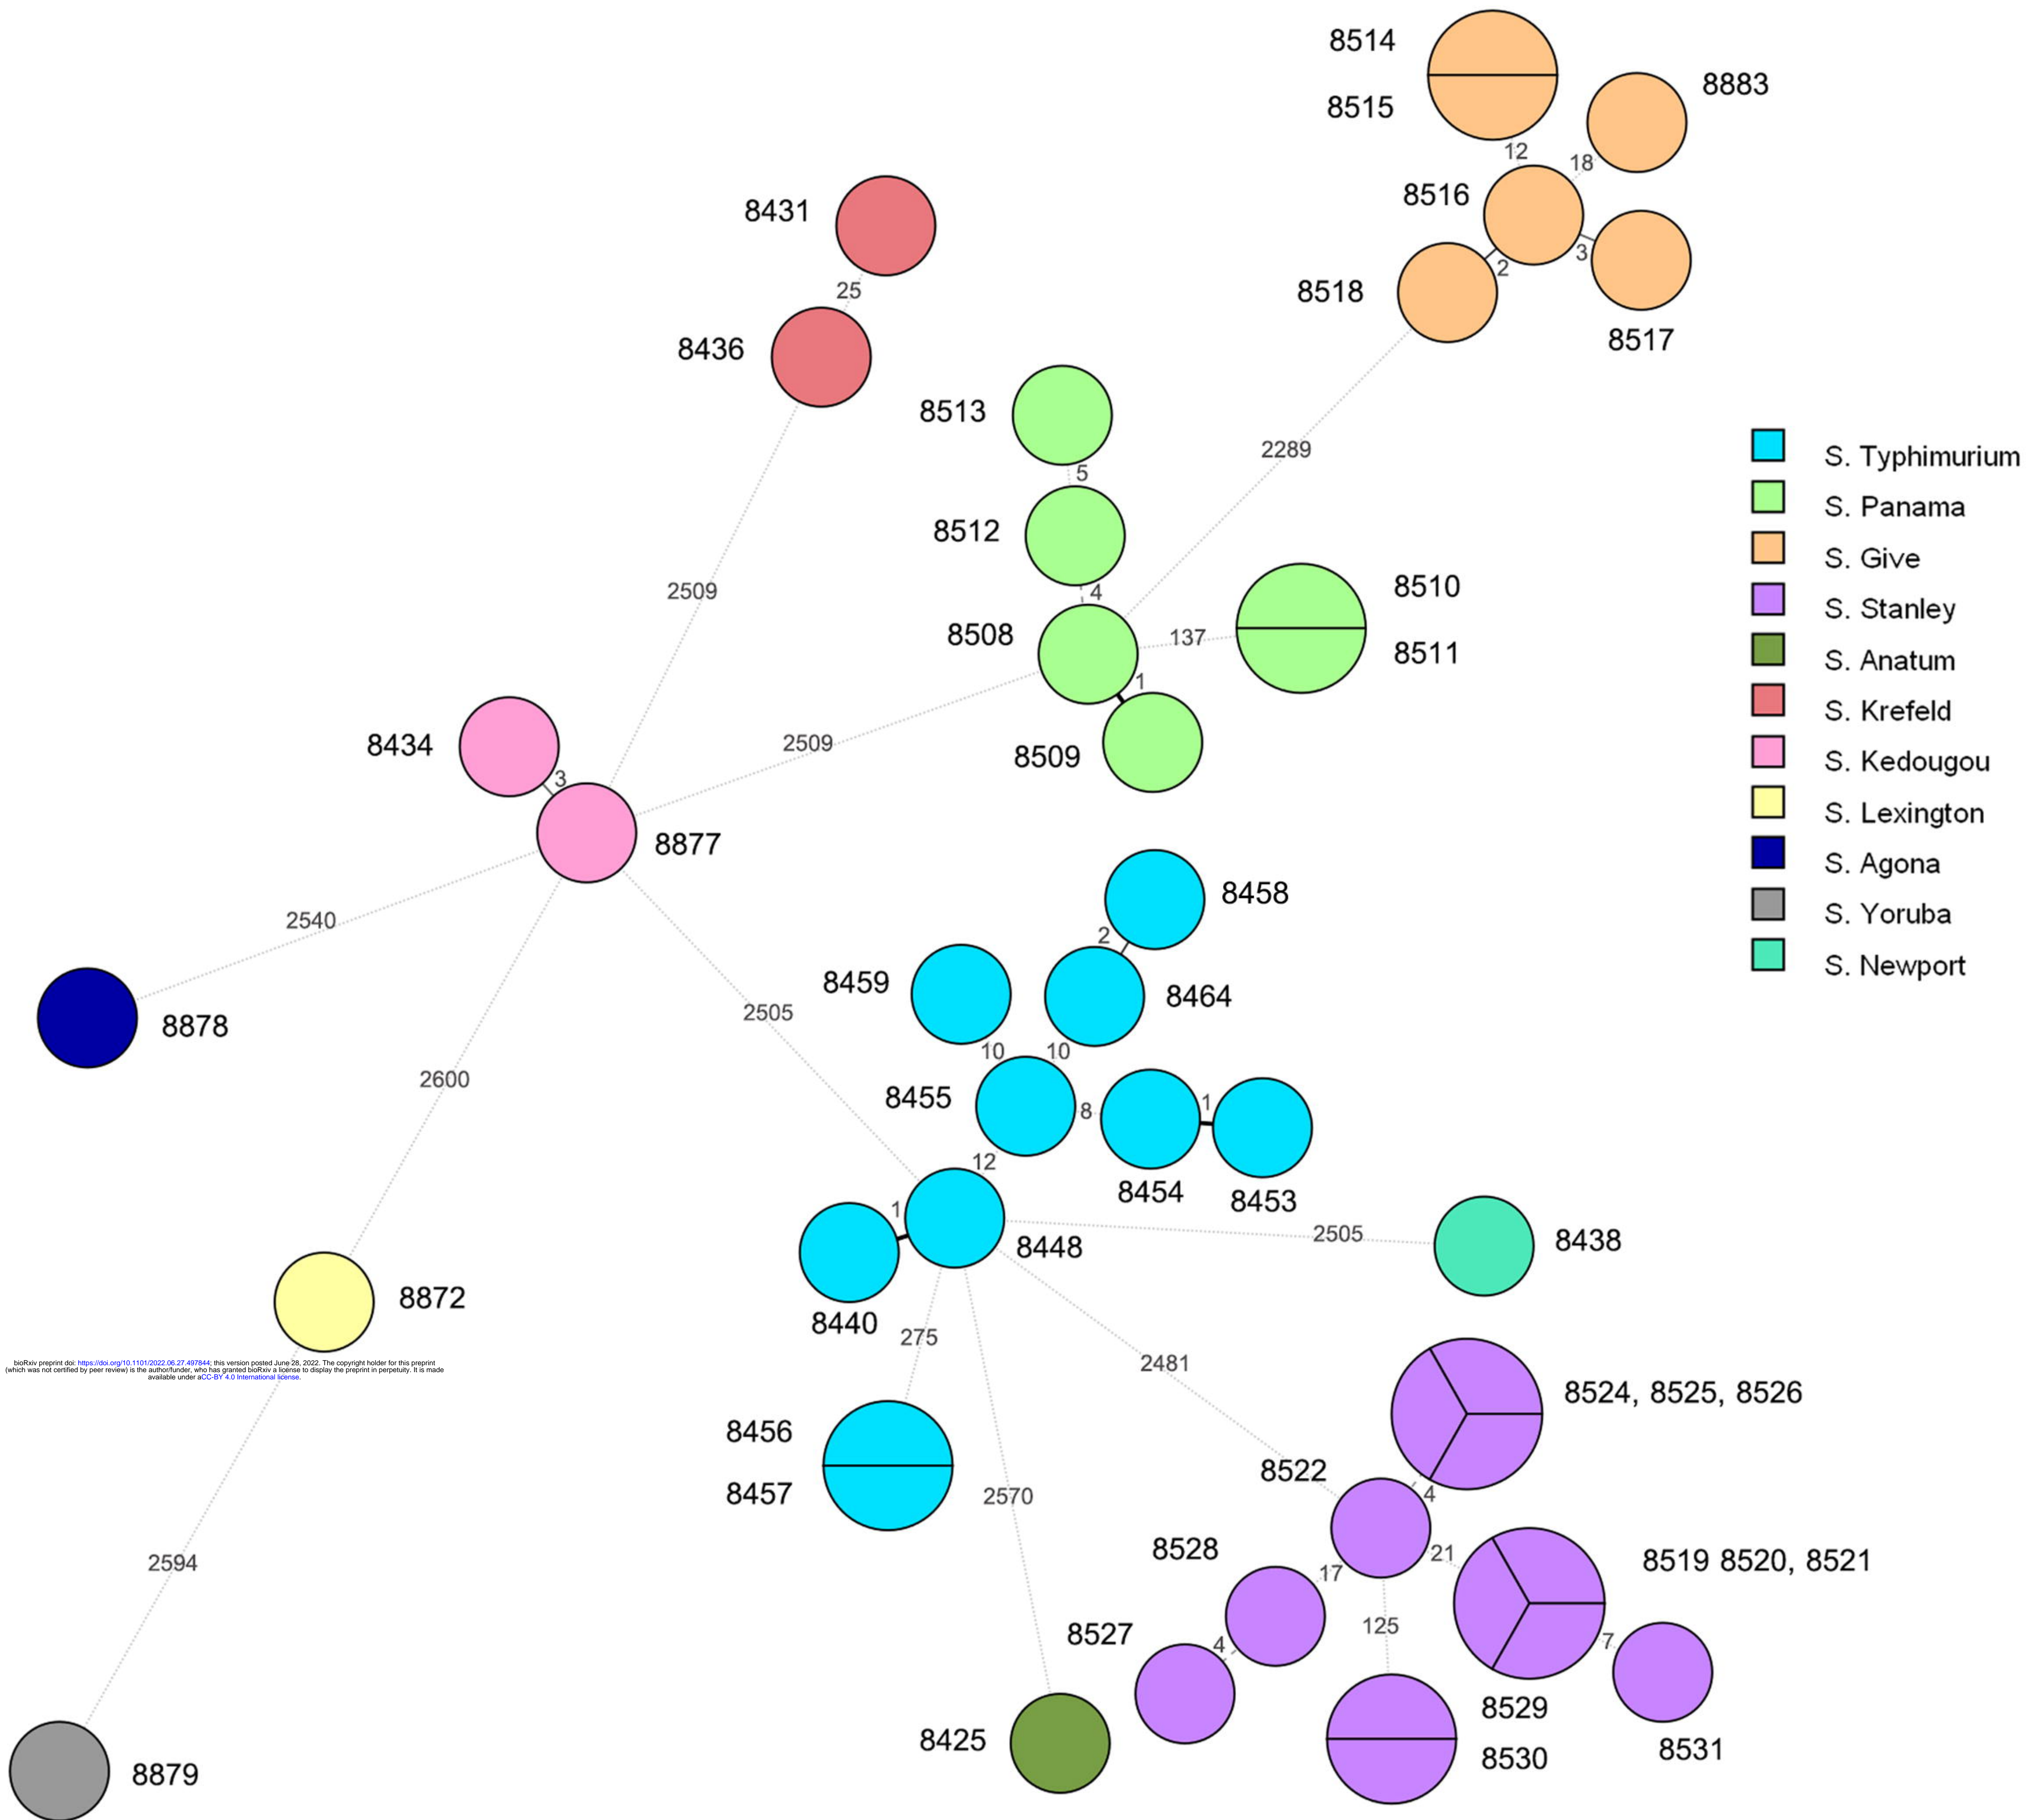

bioRxiv preprint doi: <https://doi.org/10.1101/2022.06.27.497944>; this version posted June 28, 2022. The copyright holder for this preprint (which was not certified by peer review) is the author/funder, who has granted bioRxiv a license to display the preprint in perpetuity. It is made available under aCC-BY 4.0 International license.



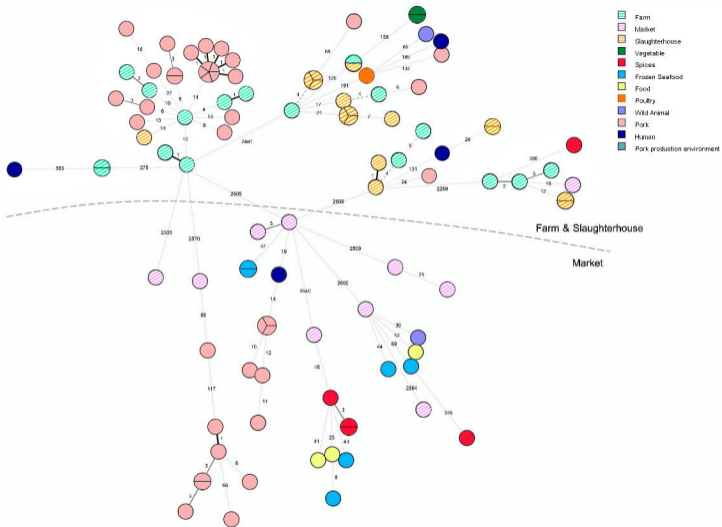

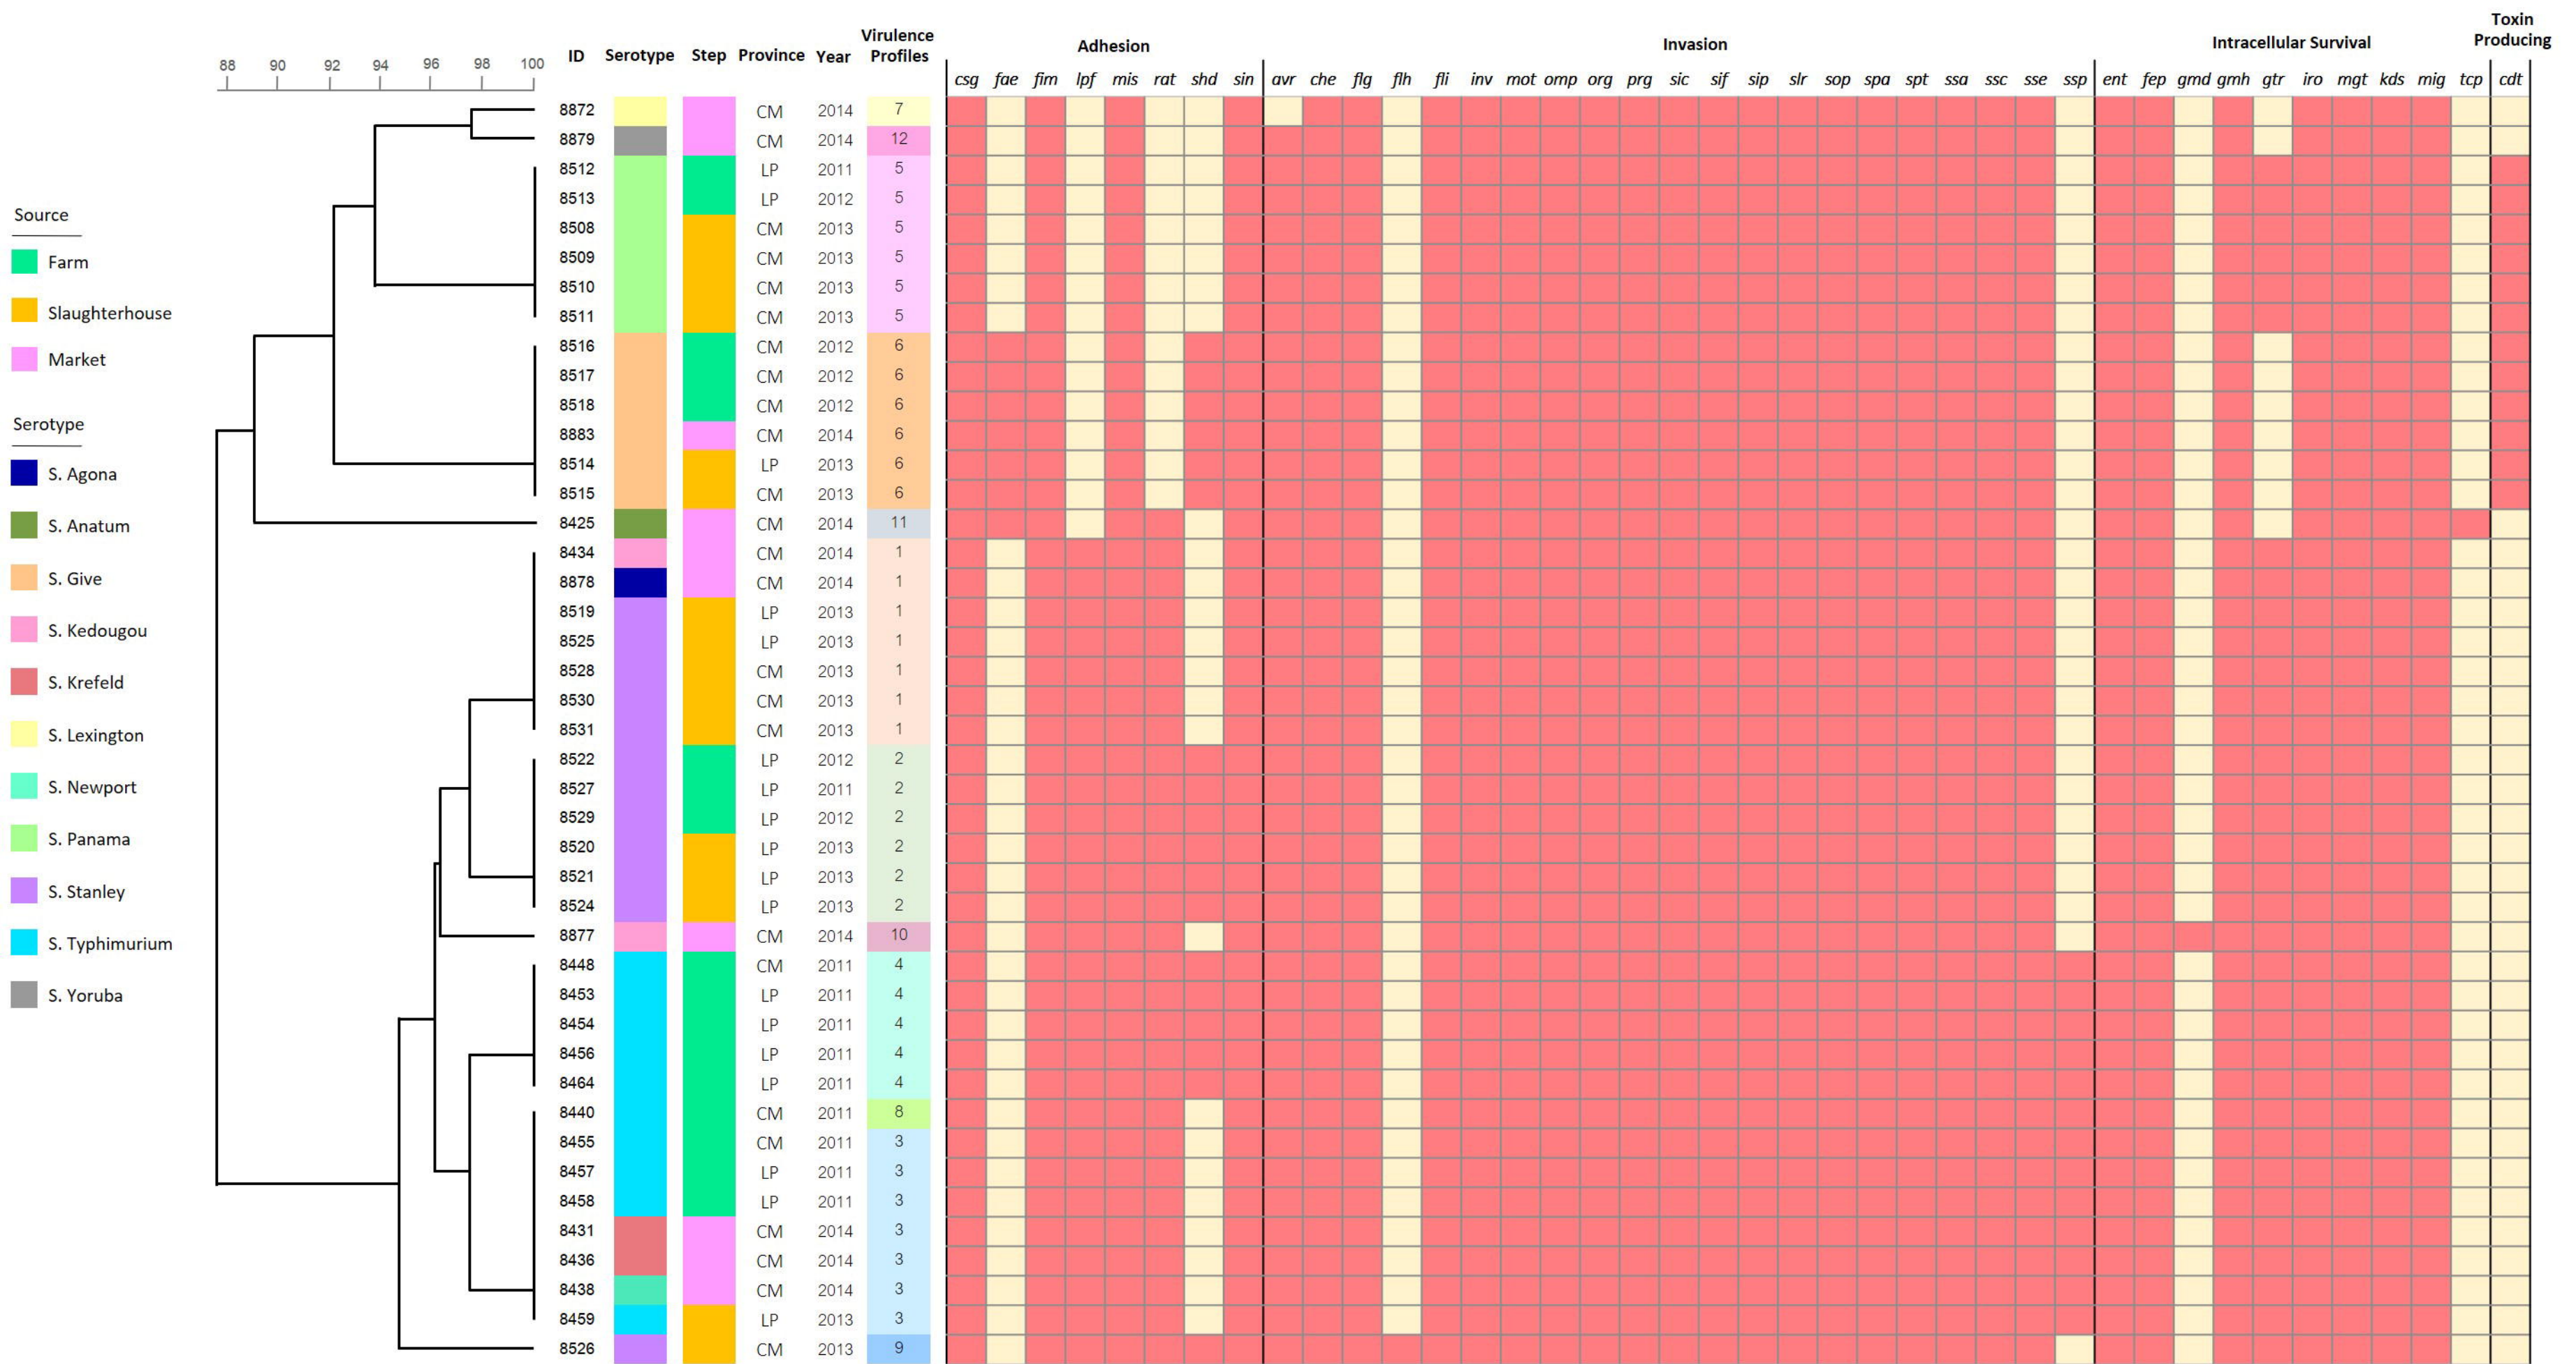

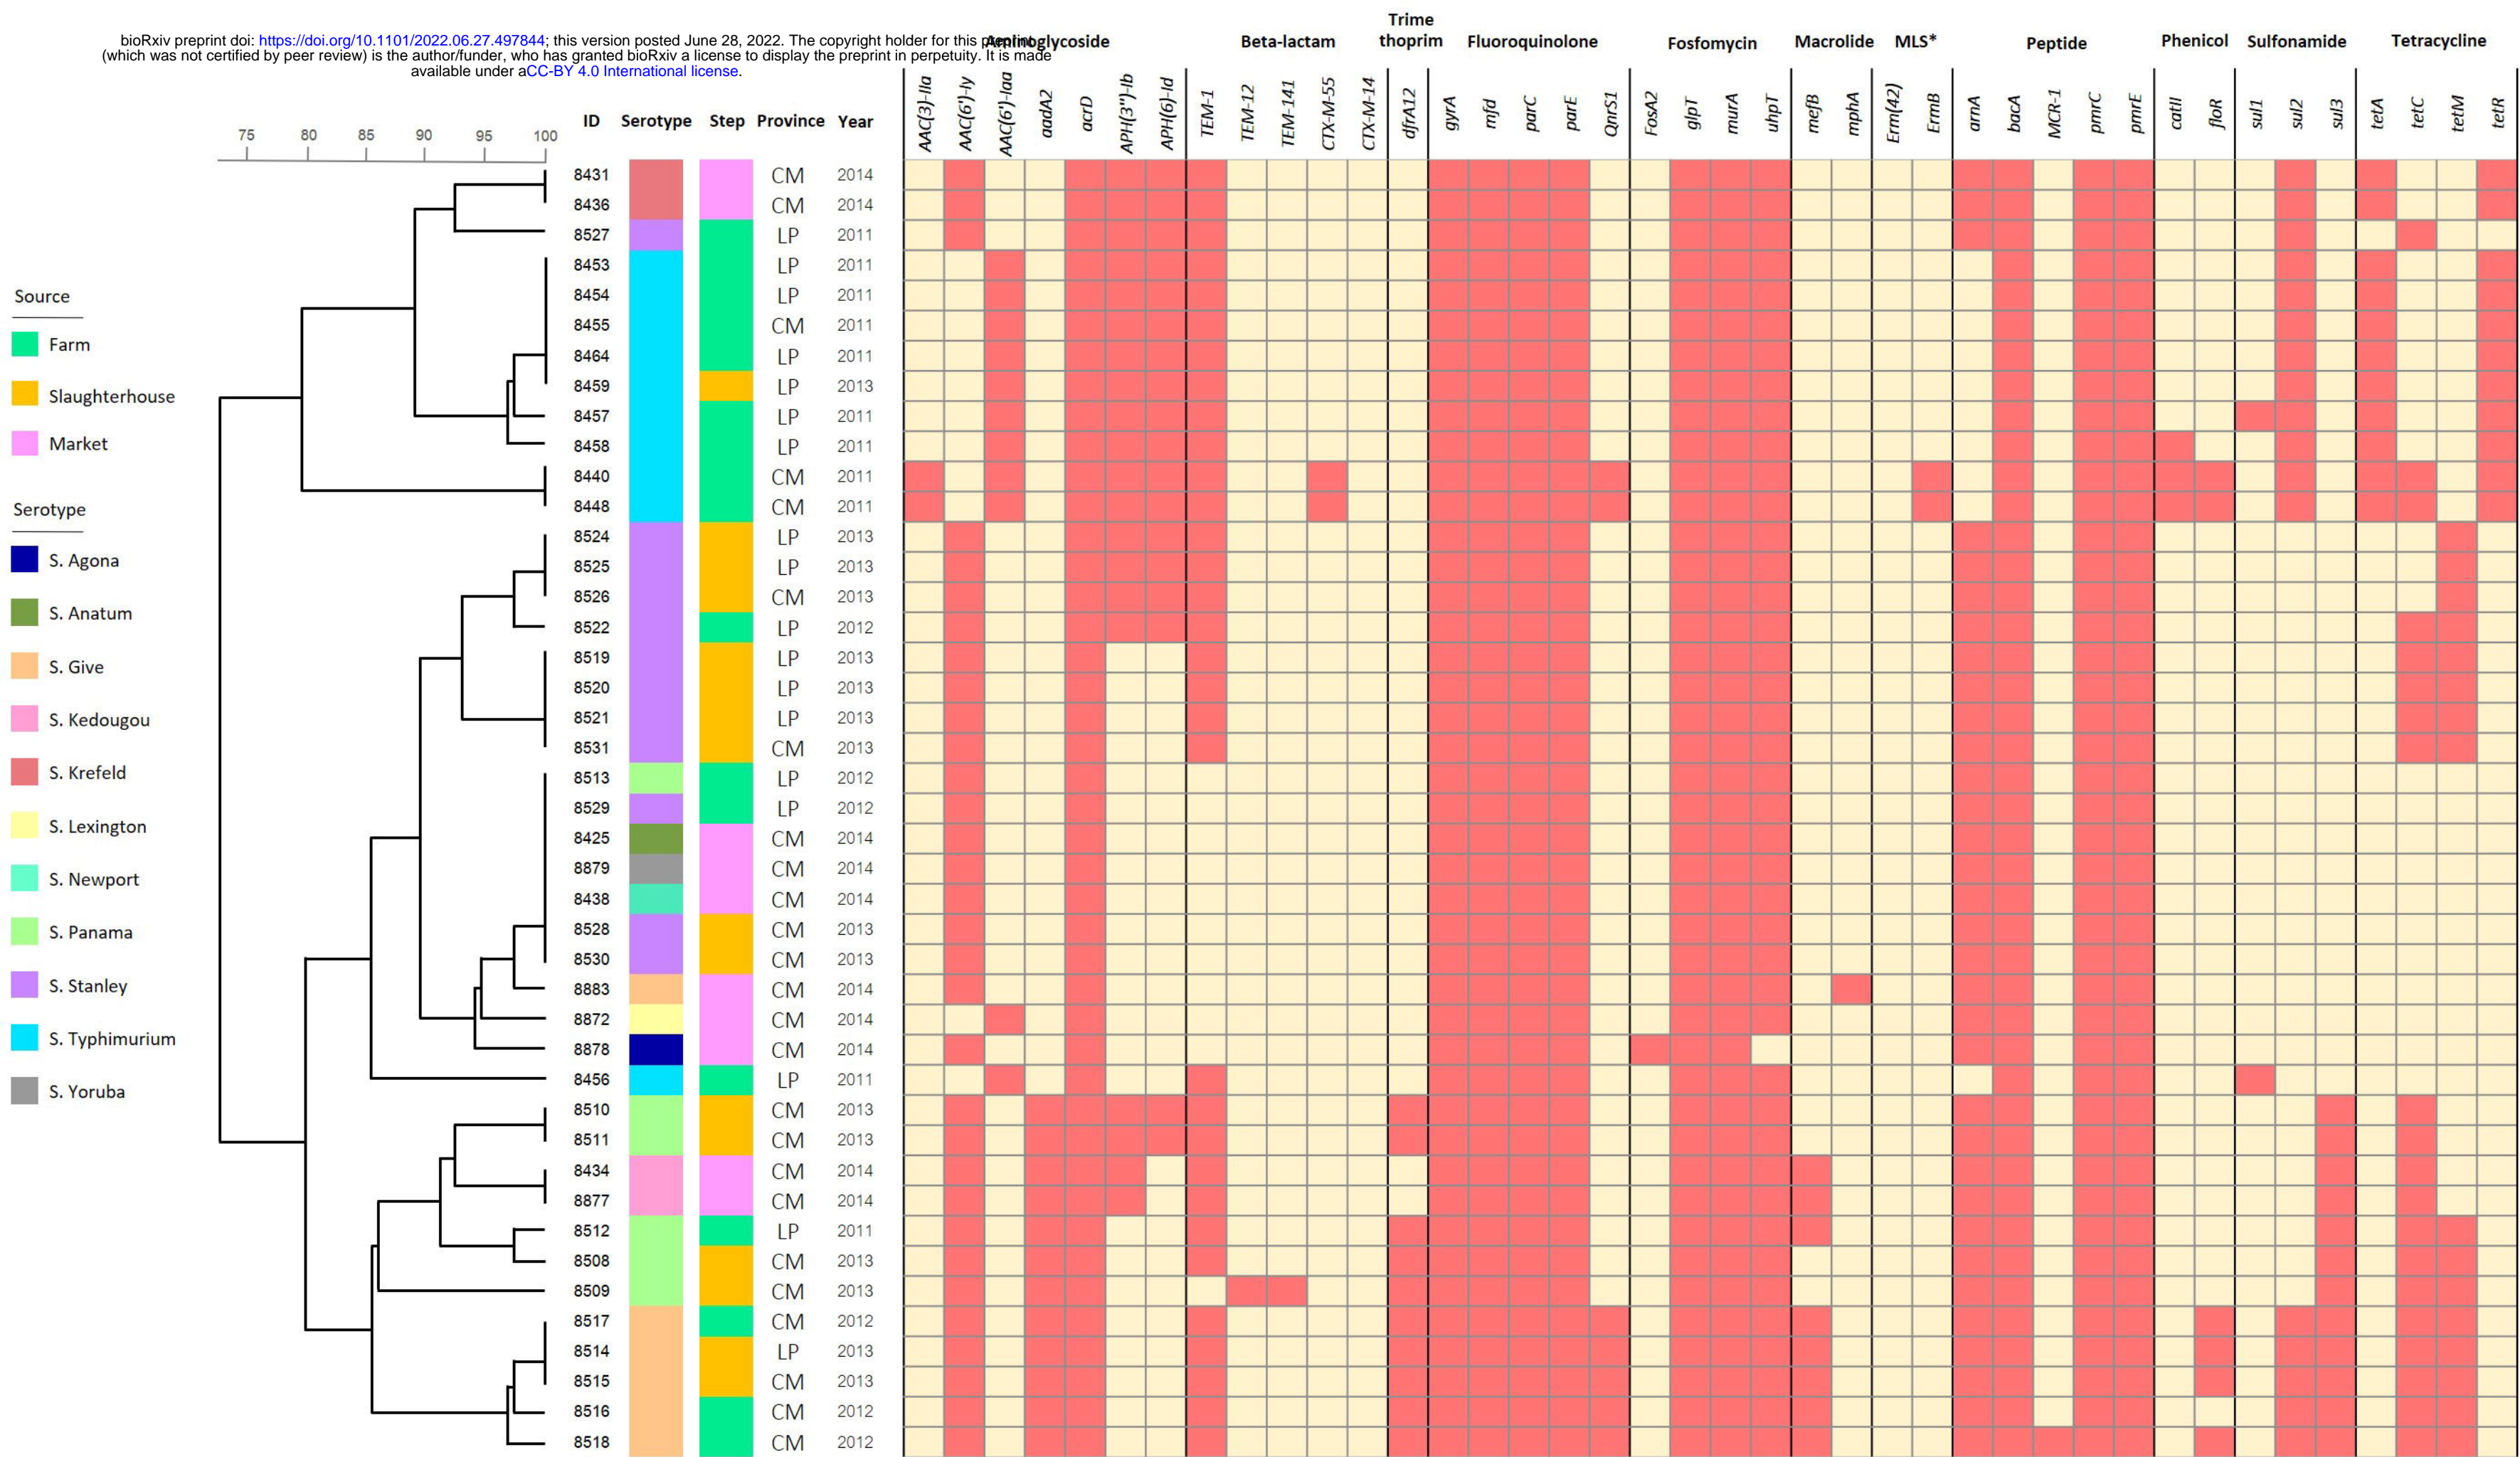

\*MLS = Macrolide-Lincosamide-Streptogramin B
